# Supplementary material for: Pleiotropic Locus for Emotion Recognition and Amygdala Volume Identified Using Univariate and Bivariate Linkage
Source: Atypon-hosted journal article supplement (doi:10.1176/appi.ajp.2014.14030311), 2014-12-17

**TABLE S1.** Standardized  $\beta$  estimates (and p values) for the covariates age, age squared, sex, and their interactions for bilateral amygdala volume and emotion recognition.

| <i>Covariate</i>  | <i>Amygdala Volume</i>              | <i>Emotion Recognition</i>          |
|-------------------|-------------------------------------|-------------------------------------|
| Age               | -0.03<br>( $1.61 \times 10^{-22}$ ) | -0.02<br>( $5.04 \times 10^{-22}$ ) |
| Sex               | -0.70<br>( $3.6 \times 10^{-21}$ )  | 0.18<br>(0.01)                      |
| Age squared       | $-1.83 \times 10^{-04}$<br>(0.24)   | $-2.59 \times 10^{-04}$<br>(0.15)   |
| Age x Sex         | $-1.98 \times 10^{-03}$<br>(0.58)   | $8.96 \times 10^{-04}$<br>(0.80)    |
| Age-squared x Sex | $-1.69 \times 10^{-04}$<br>(0.42)   | $2.64 \times 10^{-04}$<br>(0.22)    |

**TABLE S2.** Minor allele frequencies (MAF) for the top-ranked SNP (rs2622497), where available, in those populations referenced by HapMap.

| <i>Population</i> | <i>MAF</i> |
|-------------------|------------|
| ASW               | 0.09       |
| CEU               | 0          |
| CHB               | 0          |
| JPT               | 0          |
| LWK               | 0.07       |
| MKK               | 0.06       |
| YRI               | 0.11       |

FIGURE S1

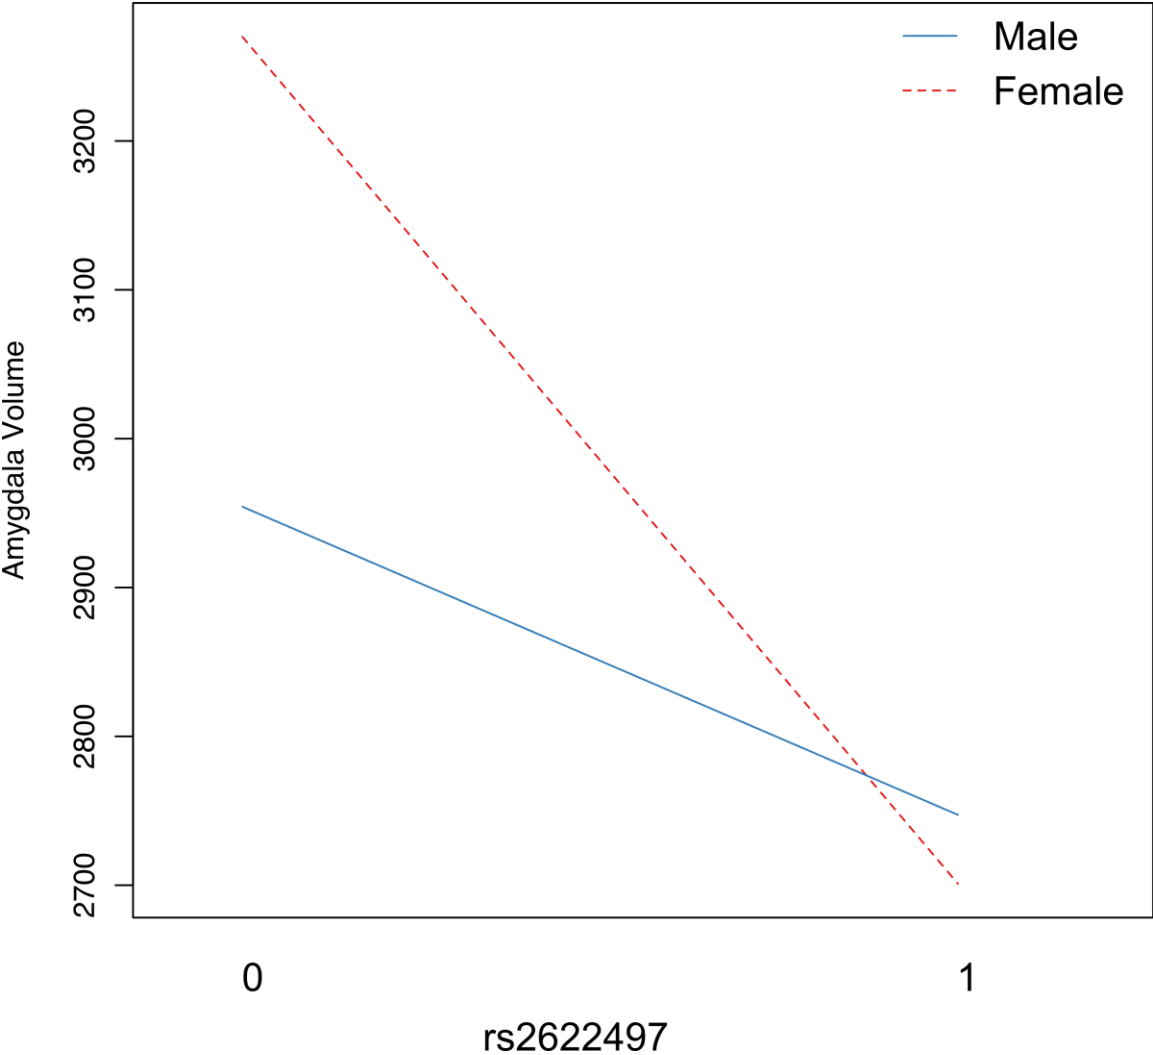

FIGURE S2

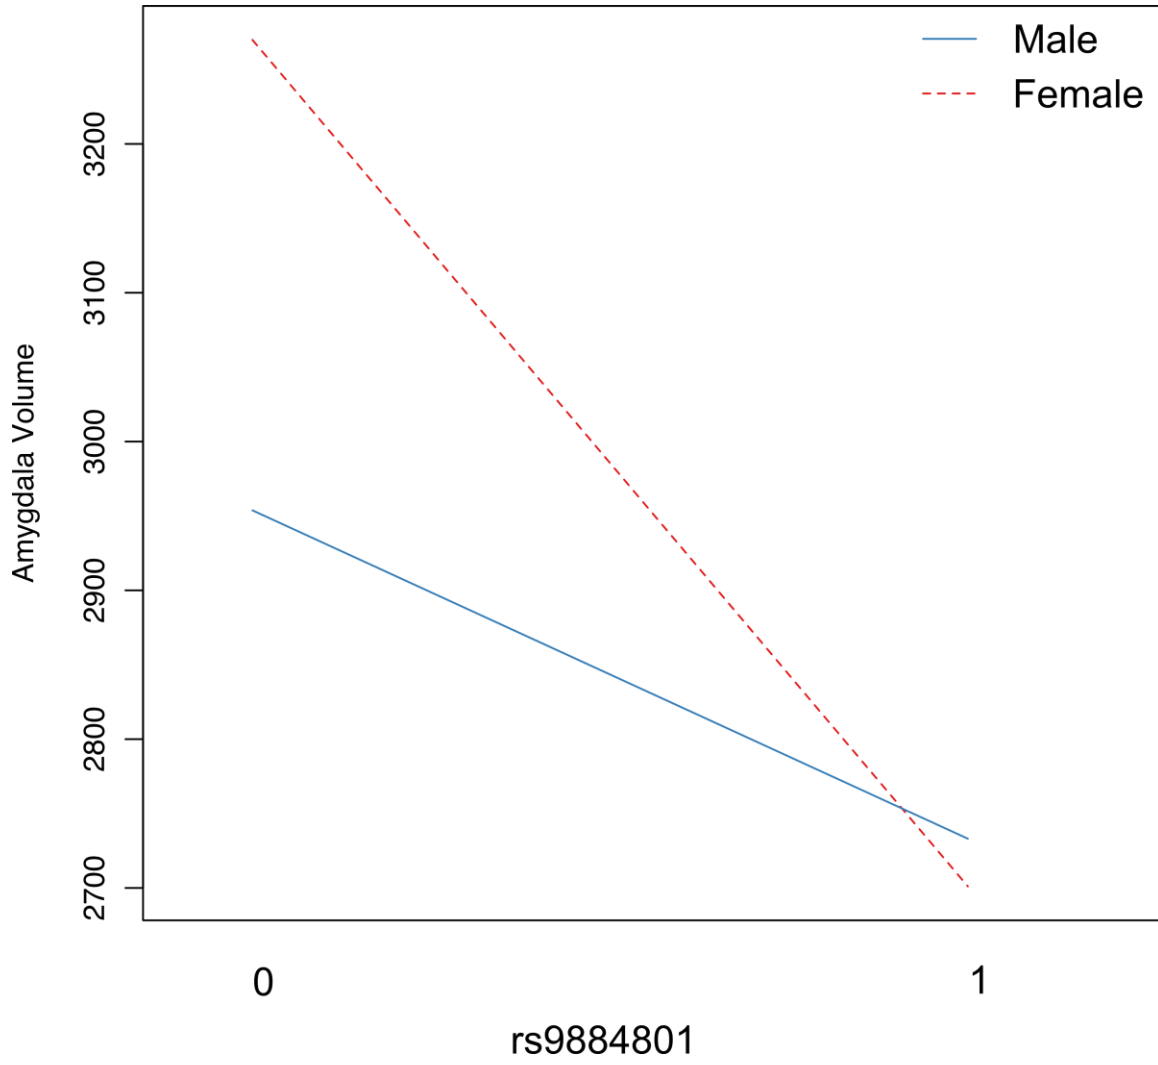

FIGURE S3

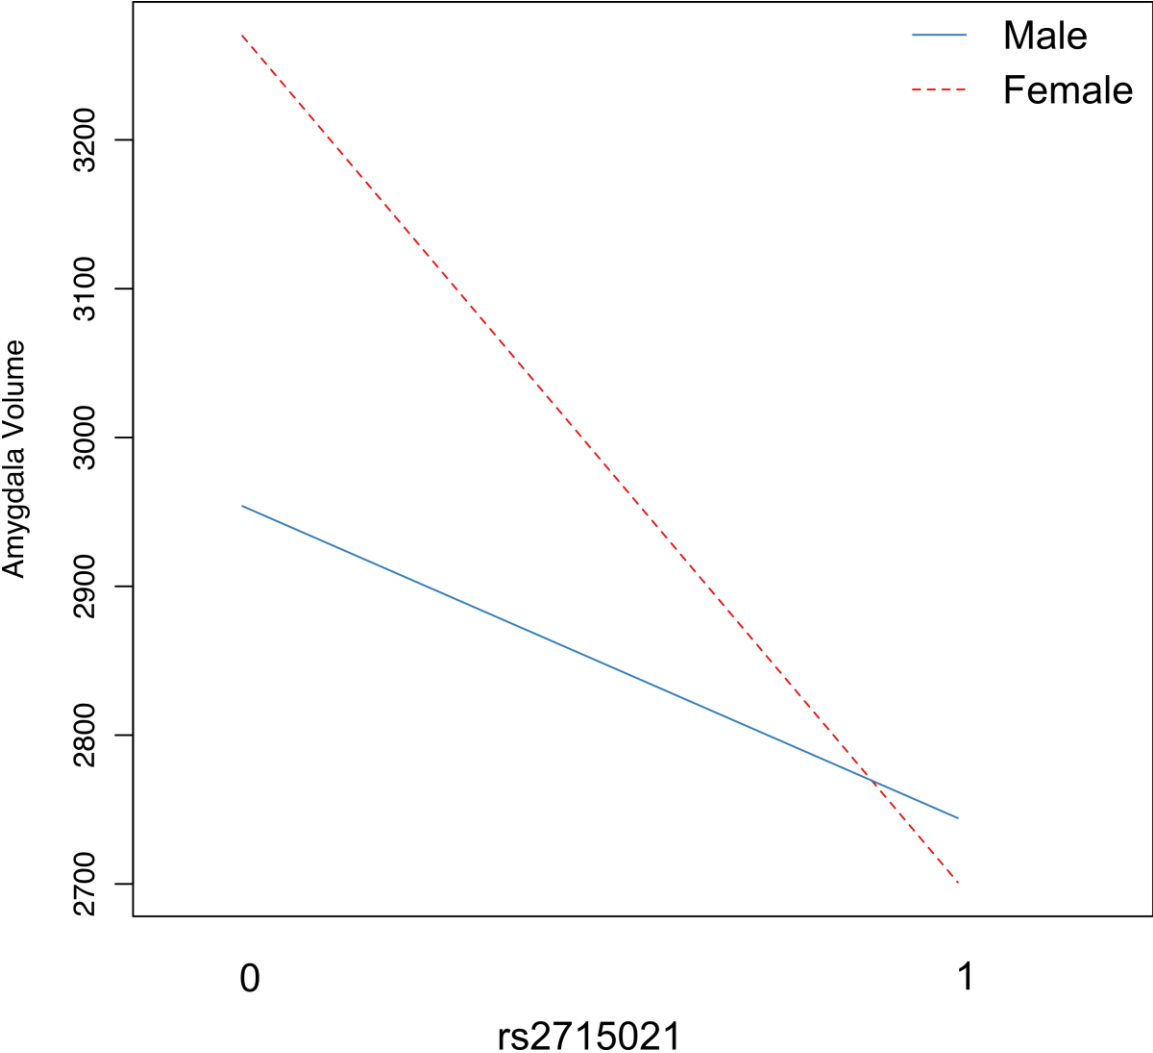

Supplement: appi.ajp.2014.14030311.ds001.pdf [file appi.ajp.2014.14030311.ds001.pdf]
